# Supplementary material
Source: PubMed Central journal article supplement (PMC2896237)
Supplement: NIHMS145767-supplement-01.pdf [file NIHMS145767-supplement-01.pdf]

## Supplementary Material

**Table S1.** Haplotype Association Analyses in Family Samples with SNPs in the *POMC* Region

| Haplotypes                    | Haplotype Freq <sup>c</sup><br>(in AAs) | AA-AD<br><i>P</i> -haplo <sup>a</sup> | AA-CD<br><i>P</i> -haplo <sup>a</sup> | AA-OD<br><i>P</i> -haplo <sup>a</sup> | Haplotype Freq <sup>c</sup><br>(in EAs) | EA-AD<br><i>P</i> -haplo <sup>a</sup> | EA-CD<br><i>P</i> -haplo <sup>a</sup> | EA-OD<br><i>P</i> -haplo <sup>a</sup> |
|-------------------------------|-----------------------------------------|---------------------------------------|---------------------------------------|---------------------------------------|-----------------------------------------|---------------------------------------|---------------------------------------|---------------------------------------|
| C-G-A-T-T                     | 0.37                                    | 0.892 (55)                            | 0.242 (48)                            | 0.822 (29)                            | 0.61                                    | 0.497 (49)                            | 0.836 (38)                            | 0.787                                 |
| G-T-A-C-T                     | 0.24                                    | 0.985 (51)                            | 0.519 (36)                            | 0.101 (20)                            |                                         |                                       |                                       |                                       |
| C-T-A-C-T                     | 0.12                                    | 0.891 (19)                            | 0.407 (18)                            | 0.434 (7)                             |                                         |                                       |                                       |                                       |
| C-G-A-C-T                     | 0.07                                    | 0.172 (14)                            | 0.375 (12)                            | 0.384 (6)                             |                                         |                                       |                                       |                                       |
| C-G-A-C-C                     | 0.07                                    | 0.413 (20)                            | 0.139 (19)                            | 0.694 (10)                            | 0.17                                    | 0.621 (28)                            | 0.121 (22)                            | 0.976                                 |
| C-G-A-T-C                     |                                         |                                       |                                       |                                       | 0.13                                    | 0.894 (22)                            | 0.063 (18)                            | 0.323                                 |
| <i>P</i> -global <sup>b</sup> |                                         | 0.644                                 | 0.343                                 | 0.537                                 |                                         | 0.863                                 | 0.109                                 | 0.735                                 |

Abbreviations: AA (or EA)-AD, African American (AA) or European American (EA) families with siblings affected with alcohol dependence (AD); AA (or EA)-CD, AA (or EA) families with siblings affected with cocaine dependence (CD); AA (or EA)-OD, AA (or EA) families with siblings affected with opioid dependence (OD).

<sup>a,b</sup> *P* values for individual haplotypes (*P*-haplo) and global *P* values (*P*-global) were obtained by the haplotype-based association test (HBAT) (numbers in parentheses are numbers of informative families).

<sup>c</sup> Rare haplotypes (frequency < 5%) are not listed.

**Table S2.** Haplotype Association Analyses in Case-control Samples with SNPs in the *POMC* Region

| <i>POMC</i><br>Haplotypes<br>(SNP1-5) | AA-Con<br>Freq <sup>c</sup> | AA-AD<br>Freq <sup>c</sup> | AA-AD vs.<br>AA-Con<br><i>P</i> -haplo <sup>a</sup> | AA-CD<br>Freq <sup>c</sup> | AA-CD vs.<br>AA-Con<br><i>P</i> -haplo <sup>a</sup> | AA-OD<br>Freq <sup>c</sup> | AA-OD vs.<br>AA-Con<br><i>P</i> -haplo <sup>a</sup> |
|---------------------------------------|-----------------------------|----------------------------|-----------------------------------------------------|----------------------------|-----------------------------------------------------|----------------------------|-----------------------------------------------------|
| C-G-A-T-T                             | 0.36                        | 0.34                       | 0.308                                               | 0.34                       | 0.402                                               | 0.42                       | 0.925                                               |
| G-T-A-C-T                             | 0.29                        | 0.27                       | 0.284                                               | 0.26                       | 0.343                                               | 0.26                       | 0.806                                               |
| C-T-A-C-T                             | 0.12                        | 0.11                       | 0.242                                               | 0.11                       | 0.283                                               | 0.09                       | 0.492                                               |
| G-T-A-T-T                             | 0.06                        | 0.06                       | 0.425                                               | 0.06                       | 0.508                                               |                            |                                                     |
| C-G-A-C-C                             | 0.05                        | 0.08                       | 0.879                                               | 0.10                       | 0.811                                               | 0.11                       | 0.590                                               |
| <i>P</i> -global <sup>b</sup>         |                             |                            | 0.791                                               |                            | 0.395                                               |                            | 0.112                                               |
| <i>POMC</i><br>Haplotypes<br>(SNP1-5) | EA-Con<br>Freq <sup>c</sup> | EA-AD<br>Freq <sup>c</sup> | EA-AD vs.<br>EA-Con<br><i>P</i> -haplo <sup>a</sup> | EA-CD<br>Freq <sup>c</sup> | EA-CD vs.<br>EA-Con<br><i>P</i> -haplo <sup>a</sup> | EA-OD<br>Freq <sup>c</sup> | EA-OD vs.<br>EA-Con<br><i>P</i> -haplo <sup>a</sup> |
| C-G-A-T-T                             | 0.65                        | 0.58                       | 0.098                                               | 0.56                       | <b>0.028</b>                                        | 0.57                       | 0.202                                               |
| C-G-A-C-C                             | 0.15                        | 0.19                       | 0.326                                               | 0.19                       | 0.058                                               | 0.18                       | 0.383                                               |
| C-G-A-T-C                             | 0.11                        | 0.13                       | 0.367                                               | 0.15                       | 0.071                                               | 0.16                       | 0.623                                               |
| <i>P</i> -global <sup>b</sup>         |                             |                            | <b>0.031</b>                                        |                            | <b>0.001</b>                                        |                            | 0.056                                               |

Abbreviations: AA (or EA)-Con, African American (AA) or European American (EA) controls; AA (or EA)-AD, AA (or EA) cases with alcohol dependence (AD); AA (or EA)-CD, AA (or EA) cases with cocaine dependence (CD); AA (or EA)-OD, AA (or EA) cases with opioid dependence (OD).

<sup>a,b</sup> *P* values for individual haplotypes (*P*-haplo) and global *P* values (*P*-global) were obtained by haplotype trend regression analyses.

<sup>c</sup> Rare haplotypes (frequency < 5%) are not listed.

Note: statistically significant *P*-values are in bold.

## Abbreviations

|                   |                                                                               |
|-------------------|-------------------------------------------------------------------------------|
| AA:               | African American                                                              |
| ACTH:             | Adrenocorticotropin                                                           |
| AD:               | Alcohol Dependence                                                            |
| AIMs:             | Ancestry Informative Markers                                                  |
| ASP:              | Affected Sibling Pair                                                         |
| Beta ( $\beta$ ): | Regression Coefficient                                                        |
| CD:               | Cocaine Dependence                                                            |
| CLIP              | Corticotrophin Like Intermediate Lobe Peptide                                 |
| Con:              | Controls                                                                      |
| DSM-III-R:        | Diagnostic and Statistical Manual of Mental Disorders, Third Edition, Revised |
| DSM-IV:           | Diagnostic and Statistical Manual of Mental Disorders, Fourth Edition         |
| EA:               | European American                                                             |
| FBAT:             | Family-based Association Test                                                 |
| HBAT:             | Haplotype-based Association Test                                              |
| HWE:              | Hardy Weinberg Equilibrium                                                    |
| IRB:              | Institutional Review Board                                                    |
| LD:               | Linkage Disequilibrium                                                        |
| LPH:              | Lipotropin                                                                    |
| MSH:              | Melanocyte-stimulating Hormone                                                |
| OD:               | Opioid Dependence                                                             |
| OR:               | Odds Ratio                                                                    |
| POMC:             | Pro-opiomelanocortin                                                          |
| SSADDA:           | Semi-Structured Assessment for Drug Dependence and Alcoholism                 |
| SCID-III-R:       | Structured Clinical Interview for DSM-III-R                                   |
| SCID-IV:          | Structured Clinical Interview for DSM-IV                                      |
| SNP:              | Single Nucleotide Polymorphism                                                |
| SP:               | Signal Peptide                                                                |
